# Supplementary material for: An Insight into Patients’ Perspectives of Ulcerative Colitis Flares via Analysis of Online Public Forum Posts
Source: PubMed Central journal article supplement (PMC11447010; doi:10.1093/ibd/izad247), 2023-11-02
Supplement: izad247_suppl_supplementary_material.pdf [file izad247_suppl_supplementary_material.pdf]

## **Supplementary Materials**

### **Methods**

#### **Interpretation of Network Diagrams**

Netbase Quid™ artificial intelligence text analytics and natural language processing (NLP) software algorithms have previously been described and utilized to analyze patient perspectives and experiences of breast cancer, atopic dermatitis, and tardive dyskinesia.<sup>1-3</sup> In brief, within a network diagram, each patient post was represented by a node, and posts with similar language were clustered together and connected. Color-coded clusters of nodes represented the different topics discussed, and the density of the clusters indicated how similar or diverse the posts were within the cluster. The nodes/posts that were centrally located contained language that was shared across multiple clusters, and thus represented core concepts. The clusters on the periphery represented niche topics that were not representative of the larger landscape. Greater distances between the clusters indicated a low number of interrelated posts, and a bridging node between 2 clusters indicated a post at an intersection between 2 concepts. The NLP algorithm used the Louvain method<sup>4</sup> to group posts by common topics based on shared similar language. Themes were mapped using a combination of keyword identification and grouping with input from the analysis team. All proprietary treatment names were replaced with generic names.

**Supplementary Table 1.** Flare-related keywords.

| <b>Explicit Flare Terminology</b> |                |                                                    |                                                  |               |
|-----------------------------------|----------------|----------------------------------------------------|--------------------------------------------------|---------------|
| <b>English</b>                    | <b>Spanish</b> | <b>German</b>                                      | <b>Italian</b>                                   | <b>French</b> |
| Flare                             | Brote, recaída | Schub                                              | Infiammazione,<br>riacutizzazione, fase acuta    | Poussée       |
| Flared                            |                |                                                    | Infiammata, infiammato,<br>infammate, infiammati |               |
| Flaring                           |                |                                                    |                                                  |               |
| Flares                            |                |                                                    | Infiammazioni,<br>riacutizzazioni, fasi acute    |               |
| Flair                             |                |                                                    |                                                  |               |
| Flaired                           |                |                                                    |                                                  |               |
| Flairing                          |                |                                                    |                                                  | Poussée       |
| Flairs                            |                |                                                    |                                                  | Flambée       |
| Attack                            | Ataque         | Attacke, fulminanter schub,<br>heftigen schub      | Attacco                                          | Crise         |
| Remission                         | Remisión       | Remission, rückgang,<br>vorübergehendes nachlassen | Remissione                                       | Rémission     |
| Relapse                           | Recaída        | Rückfall, nachlass,<br>reduzierung, minderung      | Ricaduta, ripresa di malattia                    | Rechute       |

|                     |                    |                    |                                                        |                     |
|---------------------|--------------------|--------------------|--------------------------------------------------------|---------------------|
| Inflammation        | Inflamación        | Entzündung         | Infiammazione, flogosi                                 | Inflammation        |
| Active inflammation | Inflamación activa | Aktiv inflammation | Infiammazione attiva, flogosi attiva, flogosi presente | Inflammation active |
| Active disease      | Enfermedad activa  | Aktive erkrankung  | Malattia attiva, patologia attiva                      | Une maladie active  |
| Symptom             | Síntoma            | Symptom            | Sintomo, sintomi, disturbo, disturbi                   | Symptôme, symptômes |
| Acute phase         |                    | Akutphase          |                                                        |                     |

#### Potential, Common Ulcerative Colitis Symptoms<sup>a</sup>

| English                          | Spanish                                                                 | German                           | Italian                                                | French                            |
|----------------------------------|-------------------------------------------------------------------------|----------------------------------|--------------------------------------------------------|-----------------------------------|
| Bloating, bloated, bloat         | Distensión abdominal, hinchado, hinchazón, distendido                   | Blähungen, aufgebläht, aufblasen | Gonfiore, gonfio, meteorismo                           | Ballonnements, ballonné           |
| Swollen stomach                  | Estómago hinchado, estómago inflamado, barriga hinchada, tripa hinchada | Geschwollener bauch              | Gonfia lo stomaco, gonfiore di stomaco, stomaco gonfio | Estomac gonflé                    |
| Cramp, cramps, cramping, cramped | Calambres, cólicos                                                      | Krampf, krämpfe, krämpfe, beengt | Crampo, crampi, crampiforme                            | Crampes, des crampes, des crampes |
| Spasm, spasms                    | Espasmo, espasmos                                                       | Krampf, krämpfe                  | Spasmo, spasmi, spastico                               | Spasmes, spasmes                  |
| Pain, painful                    | Dolor, doloroso                                                         | Schmerzen, schmerzen             | Dolore, dolori, doloroso                               | Douleur, douloureux               |
| Hurt, hurts                      | Dolor, duele                                                            | Schmerz, verletzt                | Male, fa male, avere male, avere dolore                | Mal, ça me fait mal               |

|                           |                                                                                                                |                        |                                                                              |                                                         |
|---------------------------|----------------------------------------------------------------------------------------------------------------|------------------------|------------------------------------------------------------------------------|---------------------------------------------------------|
| Stomachache               | Dolor de estómago, dolor de tripa, dolor de barriga                                                            | Magenschmerzen         | Mal di stomaco, dolore allo stomaco, crampi allo stomaco, fitte allo stomaco | Maux d'estomac, avoir mal au bide, douleurs abdominales |
| Uncomfortable, discomfort | Incómodo, molestias, incomodidad, disconfort                                                                   | Unbequem, beschwerden  | Disagio, a disagio                                                           | Mal à l'aise, l'inconfort, malaise                      |
| Tender, tenderness        | Sensible, sensibilidad                                                                                         | Zärtlich, zärtlichkeit | Dolorabile alla palpazione, dolorabilità al tatto                            | Sensibles, très sensibles, sensibilité                  |
| Diarrhea                  | Diarrea                                                                                                        | Durchfall              | Diarrea, dissenteria                                                         | La diarrhée, diarrhées                                  |
| Watery stool              | Heces líquidas, deposiciones líquidas, evacuaciones líquidas                                                   | Wässriger stuhl        | Diarrea acquosa, feci liquide                                                | Selles liquides                                         |
| Loose stool               | Heces sueltas, heces blandas                                                                                   | Weicher stuhl          | Feci morbide, feci molli, feci mollicce                                      | Selles molles                                           |
| Stool with mucus          | Heces con moco, deposiciones con moco, evacuaciones con moco                                                   | Hocker mit schleim     | Feci con muco, diarrea con muco, mucorrea                                    | Selles avec du mucus                                    |
| Stool with pus            | Heces con pus, deposiciones con pus, evacuaciones con pus                                                      | Hocker mit eiter       | Feci con pus, feci purulente, feci mucopurulente, diarrea con muco e pus     | Selles purulentes                                       |
| Bloody stool              | Heces con sangre, deposiciones con sangre, evacuaciones con sangre, deposiciones o evacuaciones sanguinolentas | Blutiger stuhl         | Feci con sangue, diarrea con sangue, ematochezia                             | Selles sanglantes                                       |
| Blood                     | Sangre                                                                                                         | Blut                   | Sangue                                                                       | Du sang                                                 |

|                           |                                                                     |                          |                                                                                                                |                                       |
|---------------------------|---------------------------------------------------------------------|--------------------------|----------------------------------------------------------------------------------------------------------------|---------------------------------------|
| Rectal bleeding           | Sangrado rectal                                                     | Rektale blutung          | Sanguinamento rettale, proctorragia, rettoragia, evacuazioni mucoematice                                       | Saignement rectal                     |
| Frequency, frequent       | Frecuencia, frecuente                                               | Frequenz, häufiger       | Frequenza, frequente                                                                                           | Fréquence, fréquente                  |
| Urgency, urge             | Urgencia, urgente                                                   | Dringlichkeit, drang     | Urgenza, avere urgenza, scappare in bagno                                                                      | Urgence, envie                        |
| Incontinence              | Incontinencia                                                       | Inkontinenz              | Incontinenza, non trattenere, farsela addosso                                                                  | Incontinence                          |
| Constipation, constipated | Estreñimiento, estreñido, constipación, constipado                  | Verstopfung, verstopfung | Costipazione, costipato, stitico, stitichezza                                                                  | Constipation, constipé                |
| Gas                       | Gas, gases                                                          | Gas                      | Gas, aria                                                                                                      | Gaz                                   |
| Flatulence                | Flatulencia, gases                                                  | Blähung                  | Flatulenza                                                                                                     | Flatulence                            |
| Fart                      | Pedo, se tiró un pedo, flato                                        | Furz, gefurzt            | Scoreggia, puzzetta, peto, gas intestinali, gas intestinale                                                    | Péter, pété                           |
| Borborygmi                | Borborigmos, ruidos intestinales, ruidos en la barriga o tripa      | Borborygmi               | Borborigmi, movimento di aria nella pancia, rumori della pancia                                                | Borborygmes                           |
| Body ache                 | Dolor corporal, dolor en el cuerpo                                  | Körperschmerzen          | Dolore diffuso, dolenzia del corpo, dolore ovunque, male ovunque, dolori in tutto il corpo, malessere generale | Courbatures                           |
| Tender joints             | Articulaciones sensibles, dolor articular, articulaciones dolorosas | Ausschreibung gelenke    | Articolazioni dolorose al tatto, articolazioni dolenti al tatto, articolazioni dolorabili al tatto             | Articulations sensibles, douleuresues |

|                |                                                         |                                                 |                                                                                                |                              |
|----------------|---------------------------------------------------------|-------------------------------------------------|------------------------------------------------------------------------------------------------|------------------------------|
| Painful joints | Articulaciones dolorosas, dolor en las articulaciones   | Schmerzende gelenke                             | Articolazioni dolorose, articolazioni dolenti                                                  | Articulations douloureuses   |
| Swollen joints | Articulaciones inflamadas                               | Geschwollene gelenke                            | Gonfiore delle articolazioni, articolazioni gonfie                                             | Gonflement des articulations |
| Back pain      | Dolor de espalda                                        | Rückenschmerzen                                 | Mal di schiena, male alla schiena, dolore alla schiena                                         | Mal au dos, mal de dos       |
| Backache       | Dolor de espalda                                        | Kreuzschmerzen                                  | Lombalgia                                                                                      | Mal au dos                   |
| Red eyes       | Ojos rojos                                              | Rote augen, augenentzündung                     | Occhi rossi, occhi arrossati, arrossamento degli occhi                                         | Les yeux rouges              |
| Painful eyes   | Dolor en los ojos                                       | Schmerzende augen, augenschmerzen, augenbrennen | Dolore agli occhi                                                                              | Yeux douloureux              |
| Irritated eyes | Irritación de los ojos                                  | Gereizte augen,                                 | Occhi irritati, irritazione degli occhi                                                        | Yeux irrités                 |
| Mouth ulcers   | Úlceras en la boca                                      | Geschwüre im mund                               | Ulcere della bocca, ulcerazioni della bocca, ulcere del cavo orale, ulcerazioni del cavo orale | Ulcères de la bouche         |
| Mouth sores    | Úlceras de boca, llagas en la boca, ampollas en la boca | Wunde stellen im mund                           | Lesioni della bocca, infiammazione della bocca, ferita alla bocca                              | Plaies dans la bouche        |
| Canker sores   | Aftas, llagas                                           | Aphten                                          | Afte, afta                                                                                     | Aphtes                       |
| Headache       | Dolor de cabeza, dolor en los sesos                     | Kopfschmerzen                                   | Mal di testa, dolore alla testa, cefalea                                                       | Mal de crâne                 |

|                                 |                                         |                               |                                                                |                                                           |
|---------------------------------|-----------------------------------------|-------------------------------|----------------------------------------------------------------|-----------------------------------------------------------|
| Migraine                        | Migraña, cefalea                        | Migräne                       | Emicrania                                                      | Migraine                                                  |
| Rash, rashes                    | Erupción, erupciones, exantema          | Hautausschlag, ausschlag      | Eruzioni cutanee, puntini rossi sulla pelle, sfogo cutaneo     | Éruption cutanée, des éruptions cutanées                  |
| Pyoderma gangrenosum            | Pioderma gangrenoso                     | Pyoderma gangraenosum         | Pioderma gangrenoso                                            | Pyoderma gangrenosum                                      |
| Skin erythema                   | Eritema cutáneo                         | Hautrötung                    | Eritema cutaneo, irritazione cutanea, arrossamento della pelle | Érythème cutané                                           |
| Fever                           | Fiebre, quebranto, febrícula, calentura | Fieber                        | Febbre, iperpiressia                                           | Fièvre                                                    |
| High temperatures               | Altas temperaturas                      | Hohe temperaturen             | Rialzo della temperatura                                       | Températures élevées, avoir de la température             |
| Sweat, sweating                 | Sudor, sudoroso, sudar                  | Schweiß, schwitzen            | Sudore, sudorazione                                            | La sueur, la transpiration                                |
| Vomiting, vomit, vomited        | Vómito, vómito, potar, devolver         | Erbrechen, erbrechen, erbrach | Vomito, vomitato, vomitare                                     | Vomissements, vomissements, vomit                         |
| Throwing up, throw up, threw up | Vomitar, vomitar, vomitó                | Werfen, werfen, warf          | Vomitare, rimettere                                            | Vomir, vomir, dégueuler                                   |
| Nausea, nauseous, nauseated     | Náuseas, ganas de vomitar o de potar    | Übelkeit, übelkeit, ekelte    | Nausea                                                         | Des nausées, des nausées, des nausées, nauséux, nauséuses |
| Feel sick                       | Sentirse enfermo, sentirse mal          | Krank fühlen                  | Sentirsi male, sentirsi malato,                                | Se sentir malade, se sentir mal                           |

|                               |                                                              |                                                                               |                                                                                                           |                                                          |
|-------------------------------|--------------------------------------------------------------|-------------------------------------------------------------------------------|-----------------------------------------------------------------------------------------------------------|----------------------------------------------------------|
| No appetite, loss of appetite | Falta de apetito, pérdida de apetito, inapetente, sin hambre | Kein appetit, appetitlosigkeit                                                | Senza appetito, mancanza di appetito, inappetenza, anoressia, perdita di appetito, inapetente, anoressico | Pas d'appétit, perte d'appétit, plus d'appétit           |
| Fatigue, fatigued             | Cansancio, fatiga, fatigado, agotado, astenia                | Müdigkeit, ermüdete, schlappheit                                              | Astenia, astenico, affaticamento, affaticato, stanchezza, spossatezza, stanco, spossato                   | Fatigue, fatigué                                         |
| Tired                         | Cansado                                                      | Müde                                                                          | Stanco                                                                                                    | Fatigué, épuisé, vidé                                    |
| Palpitate, palpitation        | Palpitar, palpitaciones                                      | Palpitate, palpitationen, herzklopfen, stolpern, herzhrythmusstörungen        | Palpitare, palpitazioni                                                                                   | Palpiter, palpitation                                    |
| Racing heart                  | Aceleración del ritmo cardíaco                               | Rasendes herz                                                                 | Battito accelerato                                                                                        | Coeur qui palpite                                        |
| Beating heart                 | Palpitaciones en el corazón, corazón acelerado               | Schlagendes herz, herzs Schlag                                                | Batticuore, battiti ectopici                                                                              | Cœur battant, cœur qui s'emballe, cœur qui bat trop fort |
| Fast heart rate               | Frecuencia cardíaca rápida                                   | Herzrasen, herzklopfen                                                        | Frequenza cardiaca accelerata, incremento frequenza cardiaca                                              | Rythme cardiaque rapide                                  |
| Tachycardia                   | Taquicardia                                                  | Tachykardie                                                                   | Tachicardia                                                                                               | Tachycardie                                              |
| Heart flutter                 | Aleteo del corazón                                           | Herzflimmern, vorhofflimmern                                                  | Fibrillazione                                                                                             | Flutter cardiaque                                        |
| Hard to breathe               | Dificultad para respirar, falta de aire                      | Schwer zu atmen, luftnot, atembeschwerden, dyspnoe, lufthunger, atemlosigkeit | Difficoltà nella respirazione, difficoltà a respirare, respiro difficoltoso                               | Difficile de respirer, difficultés à respirer            |



|                                |                                                           |                                      |                                |                                             |
|--------------------------------|-----------------------------------------------------------|--------------------------------------|--------------------------------|---------------------------------------------|
| Shortness of breath            | Dificultad para respirar, falta de aire, falta de aliento | Kurzatmigkei                         | Fiato corto, mancanza di fiato | Essoufflement                               |
| Dyspnoea                       | Disnea                                                    | Dyspnoe                              | Dispnea                        | Dyspnée                                     |
| Arrhythmia                     | Arritmia                                                  | Arrhythmia                           | Aritmia                        | Arythmie                                    |
| Dehydration, dehydrated        | Deshidratación,-deshidratado                              | Dehydration, dehydrated              | Disidratazione, disidratato    | Déshydratation, deshydraté                  |
| Thirst, thirsty                | Sed, sediento                                             | Durst, durst                         | Sete, assetato                 | Soif, avoir soif                            |
| Anxious, anxiety               | Ansiedad, ansioso                                         | Ängstlich, angst                     | Ansioso, ansia                 | Anxieux, l'anxiété                          |
| Nervous                        | Nervioso                                                  | Nervös                               | Nervoso, agitato               | Nerveux                                     |
| Insomnia                       | Insomnio                                                  | Schlaflosigkeit, schlafstörungen     | Insomnia                       | Insomnie                                    |
| Can't sleep                    | No puede dormir                                           | Kann nicht schlafen, schlaflosigkeit | Non riesce a dormire           | Ne peut pas dormir                          |
| Can't fall asleep              | No puede conciliar el sueño                               | Kann nicht einschlafen               | Non riesce ad addormentarsi    | Ne peut pas s'endormir, du mal à s'endormir |
| Blood mucilaginous consistency |                                                           | Geschwürbildende darmentzündung      |                                |                                             |
| Chest pain                     |                                                           | Brustschmerzen, herzscherzen         |                                |                                             |

---

**Ontology Building Words<sup>b</sup>**

---

| <b>English</b> | <b>Spanish</b>                                               | <b>German</b>         | <b>Italian</b>           | <b>French</b> |
|----------------|--------------------------------------------------------------|-----------------------|--------------------------|---------------|
| Stomach        | Estómago                                                     | Magen                 | Stomaco                  | Estomac       |
| Belly          | Ventre, abdomen, barriga                                     | Bauch, abdomen        | Pancia                   | Ventre        |
| Tummy          | Barriguita, tripa                                            | Bäuchlein             | Pancia                   | Bide          |
| Gut            |                                                              | Darm                  |                          |               |
| Body           | Cuerpo                                                       | Körper                | Corpo                    | Corps         |
| Eye            | Ojo                                                          | Auge                  | Occhio                   | Œil           |
| Mouth          | Boca                                                         | Mund                  | Bocca                    | Bouche        |
| Back           | Espalda                                                      | Zurück                | Schiena                  | Dos           |
| Head           | Cabeza                                                       | Kopf                  | Capo, testa              | Tête, crane   |
| Skin           | Piel                                                         | Haut                  | Pelle                    | Peau          |
| Joint          | Articulación                                                 | Joint                 | Articolazione            | Articulations |
| Toilet         |                                                              | Toilette, WC          |                          |               |
| Stool          | Heces, deposición                                            | Schemel               | Feci                     | Selles        |
| Bowel movement | Defecación, evacuación, deposición, movimientos intestinales | Stuhlgang, stuhldrang | Evacuazione, defecazione | Défécation    |
| BM             | BM                                                           | BM                    | BM                       | BM            |

|                               |                              |                                                                                                                           |                                                                                            |                                    |
|-------------------------------|------------------------------|---------------------------------------------------------------------------------------------------------------------------|--------------------------------------------------------------------------------------------|------------------------------------|
| Poop                          | Caca, pupú, popó, excremento | Poop                                                                                                                      | Cacca                                                                                      | Caca                               |
| Poo                           |                              | Poo                                                                                                                       | Cacca                                                                                      | Caca                               |
| Shit                          | Mierda                       | Scheisse, hinterlassenschaft, kot, stuhl, notdurft, exkrement, haufen, kacke, scheiße, aa, kacka, dejekt, fäzes, fäkalien | Merda                                                                                      | Merde                              |
| Blood, bloody, bleeding, bled | Sangre, con sangre, sangrado | Blut, blutig, bluten                                                                                                      | Sangue, sanguinoso, sanguinolento, sanguinante, sanguinamento, sanguinava, ha perso sangue | Sang, saignant, saignement, saigné |
| Mucus                         | Moco                         | Schleim                                                                                                                   | Muco                                                                                       | Mucus                              |
| Pus                           | Pus                          | Stellen                                                                                                                   | Pus, materiale purulento                                                                   | Pus                                |
| Pain, painful                 | Dolor, doloroso              | Schmerz, schmerzhaft                                                                                                      | Dolore, doloroso                                                                           | La douleur, douloureux             |
| Ache                          | Dolor                        | Schmerzen                                                                                                                 | Dolore                                                                                     | Mal, maux                          |
| Joint                         | Articulación                 | Joint                                                                                                                     | Articolazione                                                                              | Articulations, articulation        |
| Sore                          | Doloroso                     | Wunde, geschwür, weh                                                                                                      | Doloroso, infiammato                                                                       | Douloureux, endolori               |
| Ulcer                         | Úlcera                       | Úlcera, ulcus, ulzeration, geschwür                                                                                       | Úlcera                                                                                     | Ulcère                             |
| Appetite                      | Apetito                      | Appetit                                                                                                                   | Appetito                                                                                   | Appétit                            |
| Heart                         | Corazón                      | Herz                                                                                                                      | Cuore                                                                                      | Cœur                               |

|                        |                                    |                                           |                                                       |                                   |
|------------------------|------------------------------------|-------------------------------------------|-------------------------------------------------------|-----------------------------------|
| Heartbeat              | Latido del corazón,<br>palpitación | Herzschlag                                | Battito cardiaco                                      | Battement de coeur                |
| Breath                 | Aliento                            | Atem                                      | Respiro                                               | Souffle                           |
| Breathe, breathing     | Respirar, respiración              | Atmen, atmen                              | Respirare, respirazione                               | Respirer, respiration             |
| Sleep, sleeping, slept | Sueño, dormir, dormido             | Schlaf, schlafen, schlief,<br>schlappheit | Sonno, dormire, dormiente,<br>dormiva, stava dormendo | Dormir, dormir, dormi,<br>endormi |
| Pain management        |                                    | Schmerztherapie                           |                                                       |                                   |
| Weight loss            |                                    | Gewichtsverlust                           |                                                       |                                   |

<sup>a</sup> Included combinations of terms (eg, bloody poop, blood in stool).

<sup>b</sup> The following terms were not searched for individually but paired (eg, bloody poop, blood in stool) to explore all potential variations for translation purposes.

**Supplementary Figure 1.** The top 10 ranked flare-related topics discussed by patients with UC in (A) the United States and (B) European countries.

**A**

|    | Discussion Topic<br>(in decreasing order of rank)              | Total Volume | Unique Authors | Negative Sentiment | Betweenness Centrality | Recency  |
|----|----------------------------------------------------------------|--------------|----------------|--------------------|------------------------|----------|
| 1  | Dietary recommendations                                        | High         | High           | Moderate           | Low                    | High     |
| 2  | Experiences with mesalamine and other oral/rectal formulations | High         | High           | Low                | Low                    | High     |
| 3  | Medical test results and experiences                           | Moderate     | High           | Very low           | Moderate               | Low      |
| 4  | Immune system and gut bacteria association                     | Moderate     | Low            | High               | Moderate               | Moderate |
| 5  | Mental health management                                       | Moderate     | Low            | Very high          | Very low               | Very low |
| 6  | Bloody stool                                                   | Low          | Moderate       | Moderate           | Moderate               | Low      |
| 7  | Tapering off drugs                                             | Low          | Moderate       | Moderate           | High                   | Very low |
| 8  | Comparing severity of flares                                   | Low          | Moderate       | Moderate           | Moderate               | Low      |
| 9  | Urgency and frequency                                          | Very low     | Moderate       | Moderate           | High                   | Very low |
| 10 | Experiences with budesonide                                    | Very low     | Very low       | Moderate           | High                   | Moderate |

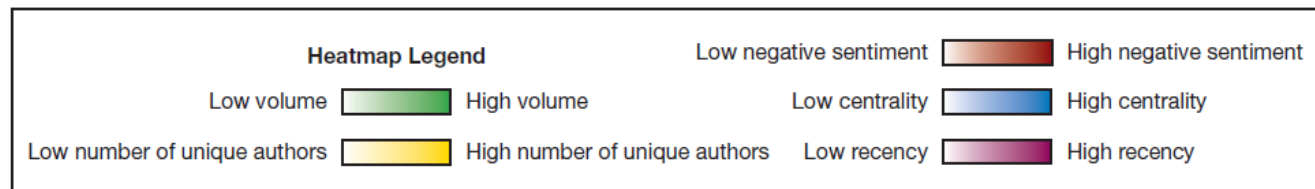

B

|    | Discussion Topic<br>(in decreasing order of rank) | Total Volume | Unique Authors | Negative Sentiment | Betweenness Centrality | Recency  |
|----|---------------------------------------------------|--------------|----------------|--------------------|------------------------|----------|
| 1  | Dietary recommendations                           | High         | High           | Very low           | Low                    | Moderate |
| 2  | Peer support and mental health                    | High         | High           | Moderate           | Moderate               | Moderate |
| 3  | Impact of UC on quality of life                   | High         | High           | Moderate           | Moderate               | Moderate |
| 4  | Medical test results and experiences              | High         | Moderate       | Very low           | Moderate               | Very low |
| 5  | Abdominal pain                                    | Moderate     | Moderate       | Very high          | High                   | Very low |
| 6  | Blood and mucus in stool                          | Moderate     | Moderate       | Low                | Moderate               | Very low |
| 7  | Experiences with corticosteroid treatment         | Moderate     | Low            | High               | High                   | Very low |
| 8  | Urgency and frequency                             | Moderate     | Low            | Low                | Very low               | High     |
| 9  | Treatment side effects                            | Low          | Low            | Moderate           | Low                    | Moderate |
| 10 | Impact of antibiotics on UC flares                | Very low     | Very low       | Moderate           | High                   | High     |

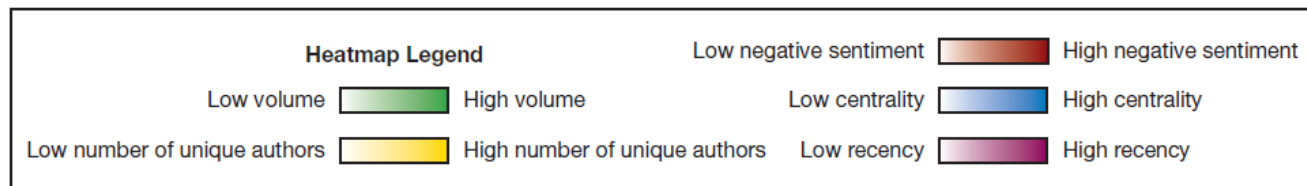

Flare-related posts, including those from the same author pre- and postflare, were identified from posts written by patients with UC on 8 online public forums in 6 different countries due to the inclusion of keywords. Posts were stratified by region (United States and European countries

[France, Germany, Italy, Spain, and the United Kingdom]) and topics were identified and ranked by a combined weighted score of volume (40%), unique authors (20%), negative sentiment (15%), betweenness centrality (15%), and recency (10%). UC, ulcerative colitis.

## References

1. Law EH, Auil MJ, Spears PA, Berg K, Winnette R. Voice analysis of cancer experiences among patients with breast cancer: VOICE-BC. *J Patient Exp*. 2021;8:23743735211048058.
2. Farrar M, Lundt L, Franey E, Yonan C. Patient perspective of tardive dyskinesia: results from a social media listening study. *BMC Psychiatry*. 2021;21(1):94.
3. Silverberg JI, Feldman SR, Smith Begolka W, et al. Patient perspectives of atopic dermatitis: comparative analysis of terminology in social media and scientific literature, identified by a systematic literature review. *J Eur Acad Dermatol Venereol*. 2022;36(11):1980-1990.
4. Blondel VD, Guillaume J-L, Lambiotte R, et al. Fast unfolding of communities in large networks. *J Stat Mech*. 2008;2008:P10008.
